# Supplementary material for: Region-specific amyloid-β accumulation in the olfactory system influences olfactory sensory neuronal dysfunction in 5xFAD mice
Source: PubMed Central journal article supplement (PMC7784287; doi:10.1186/s13195-020-00730-2), 2021-01-04

\*\*\* titles and legends are included in the main text \*\*\*

**Title**

**Region specific amyloid- $\beta$  accumulation in the olfactory system influences olfactory sensory neuronal dysfunction in 5xFAD mice**

**Authors**

Gwooon Son<sup>1,4,†</sup>, Seung-Jun Yoo<sup>1,2,#,†</sup>, Shinwoo Kang<sup>5</sup>, Ameer Rasheed<sup>1</sup>, Da Hae Jung<sup>1</sup>, Hyunjun Park<sup>5</sup>, Bongki Cho<sup>1,2</sup>, Harry W.M. Steinbusch<sup>4</sup>, Keun-A Chang<sup>5</sup>, Yoo-Hun Suh<sup>5</sup>, Cheil Moon<sup>1,2,3\*</sup>

**Affiliations**

<sup>1</sup>Department of Brain & Cognitive Sciences, Graduate School, Daegu Gyeongbuk Institute of Science and Technology (DGIST), Daegu, Republic of Korea.

<sup>2</sup>Convergence Research Advanced Centre for Olfaction, Daegu Gyeongbuk Institute of Science and Technology (DGIST), Daegu, Republic of Korea.

<sup>3</sup>Korea Brain Research Institute, Daegu, Republic of Korea.

<sup>4</sup>School for Mental Health and Neuroscience, Maastricht University, Maastricht, the Netherlands.

<sup>5</sup>Department of Pharmacology, School of Medicine, Gachon Medical School, Incheon, Republic of Korea.

† These two authors contributed equally to this work

# Present address for S Yoo: Max Planck Research Unit for Neurogenetics, Frankfurt, Germany

\*Corresponding author: Cheil Moon, Ph.D. E-mail: cmoon@dgist.ac.kr

Figure S1.

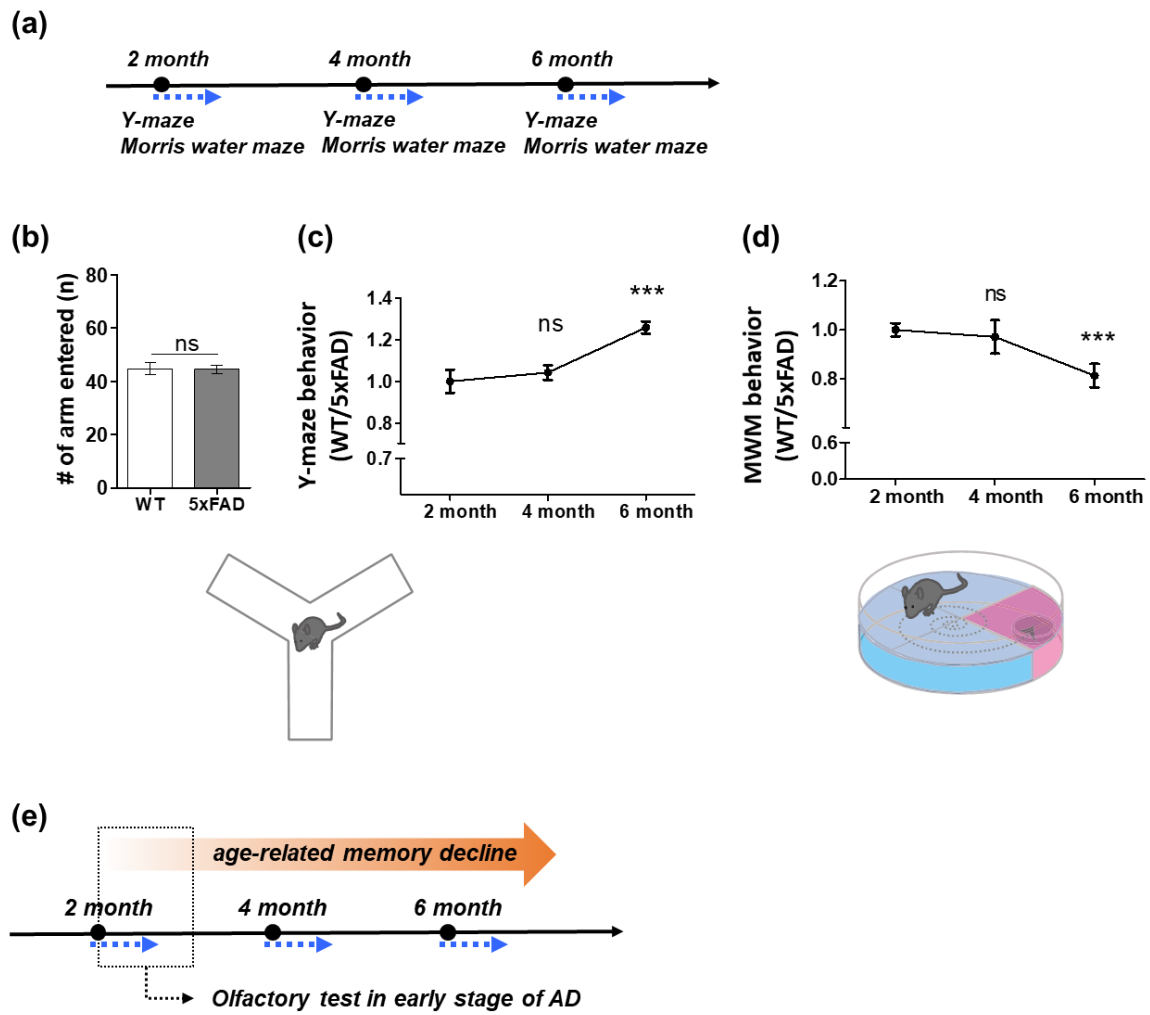

**Figure S2.**

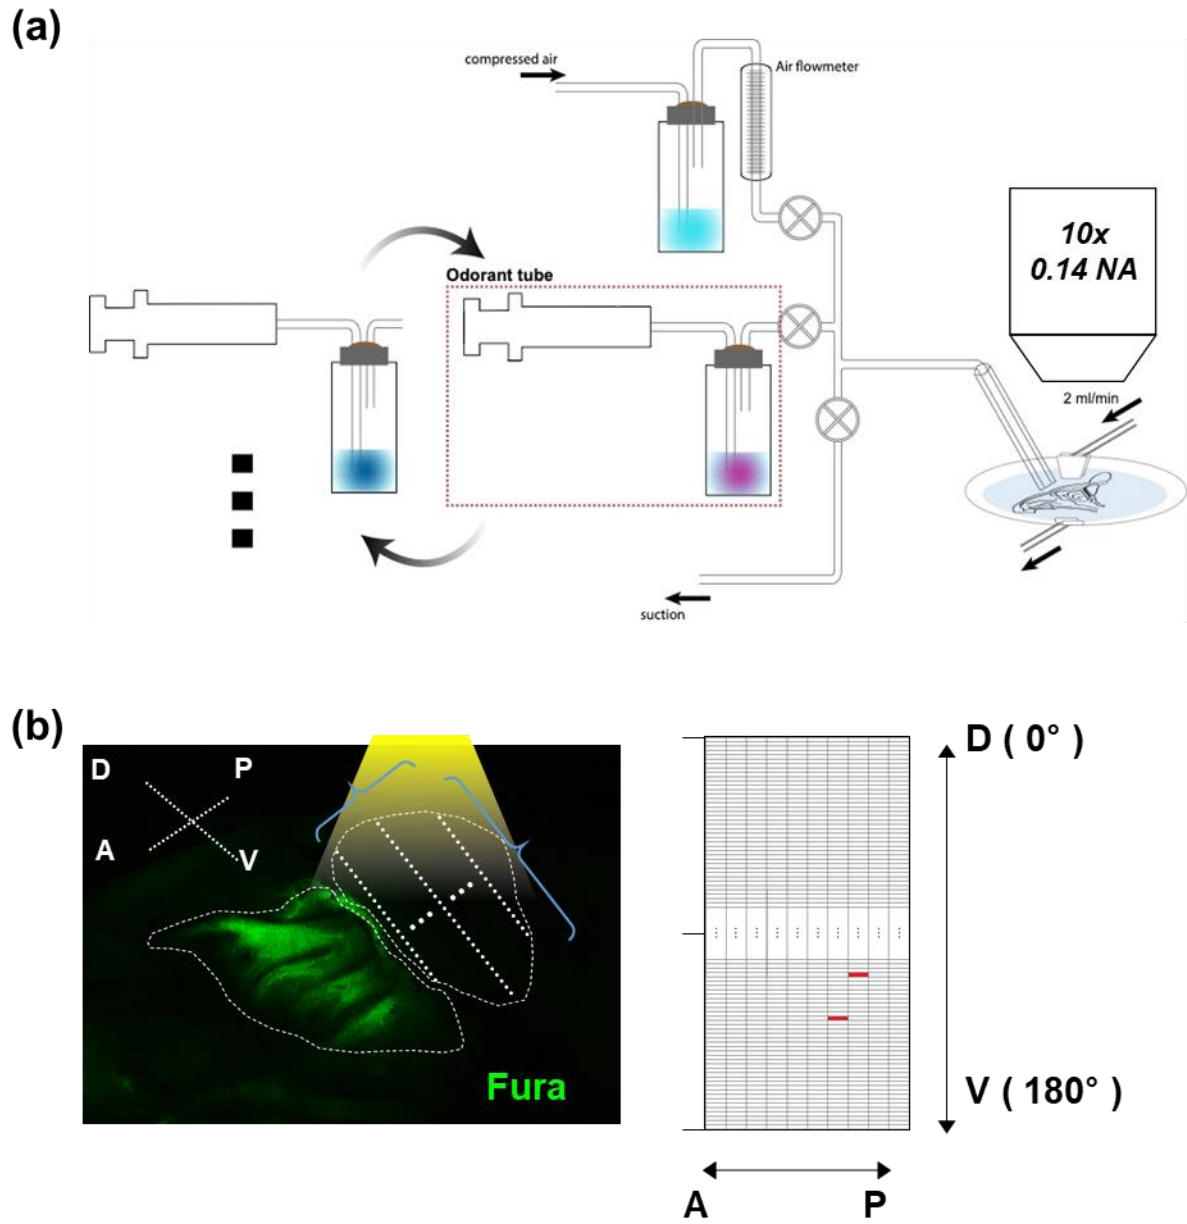

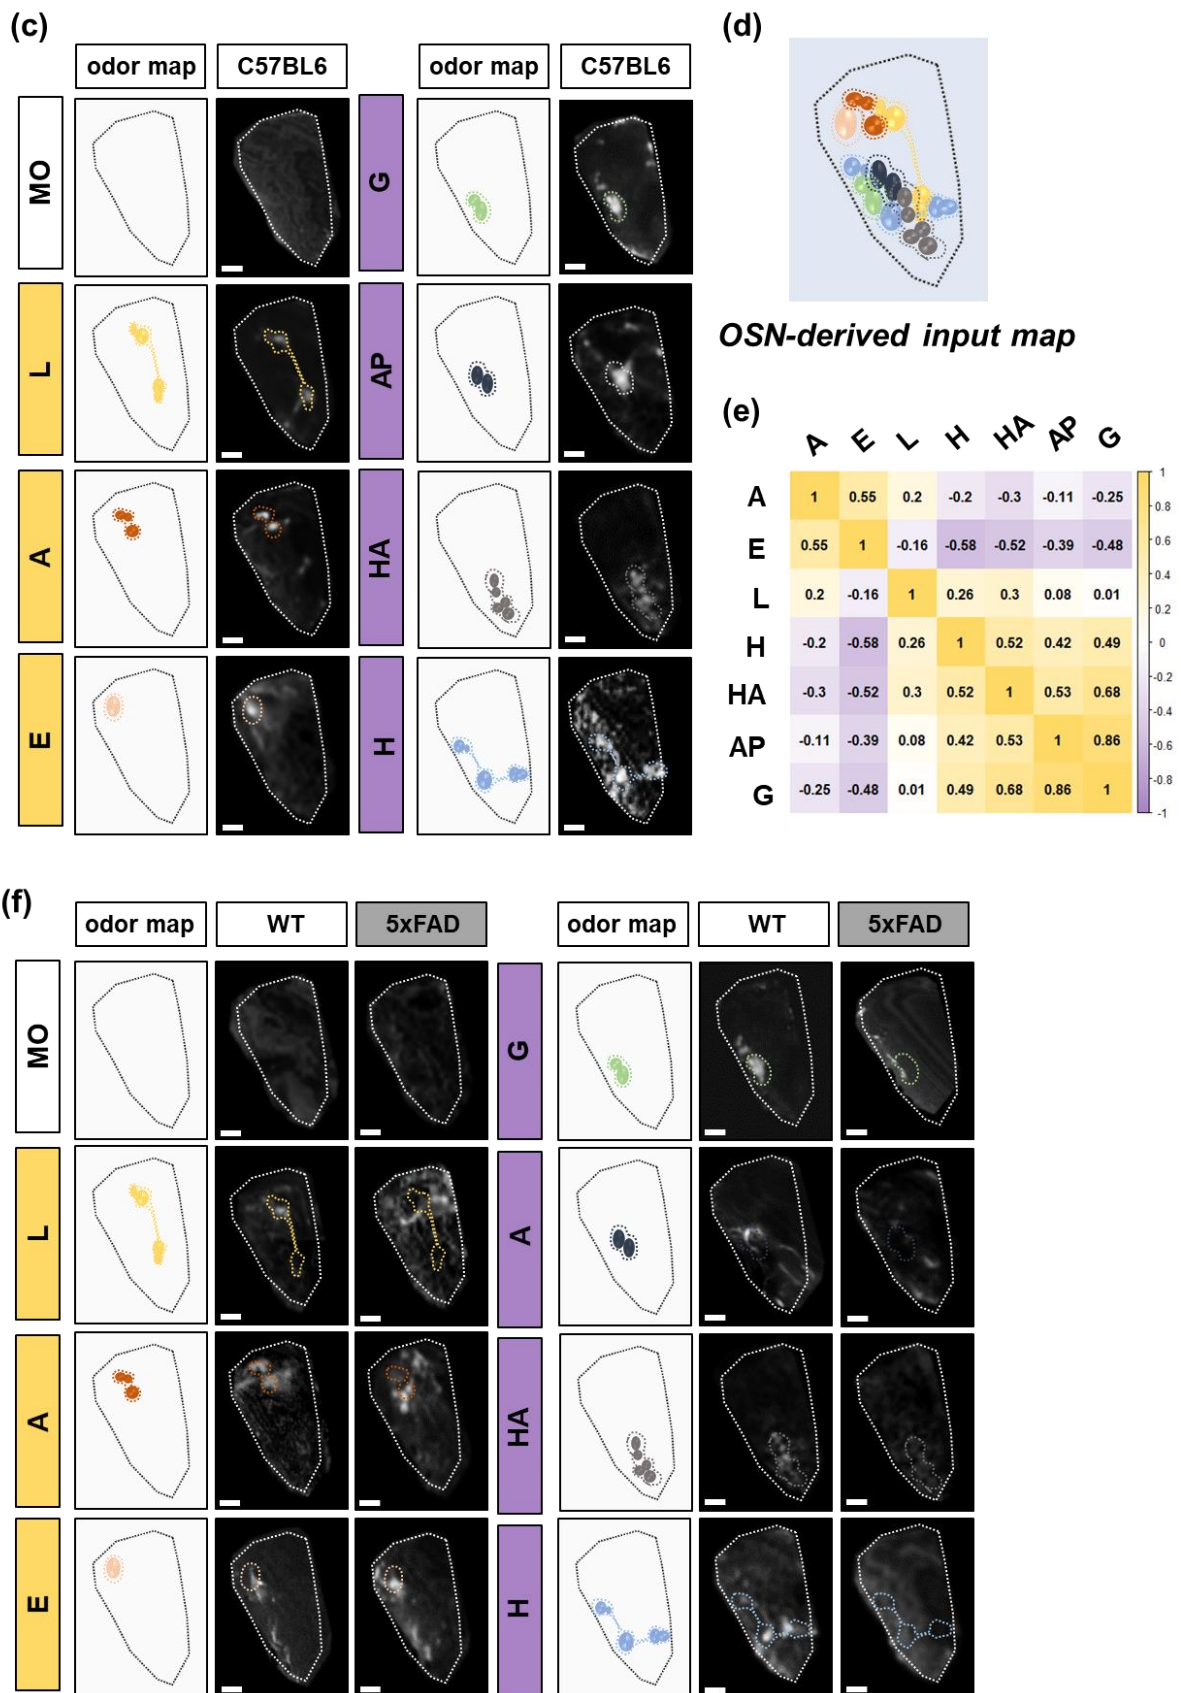

**Figure S3.**

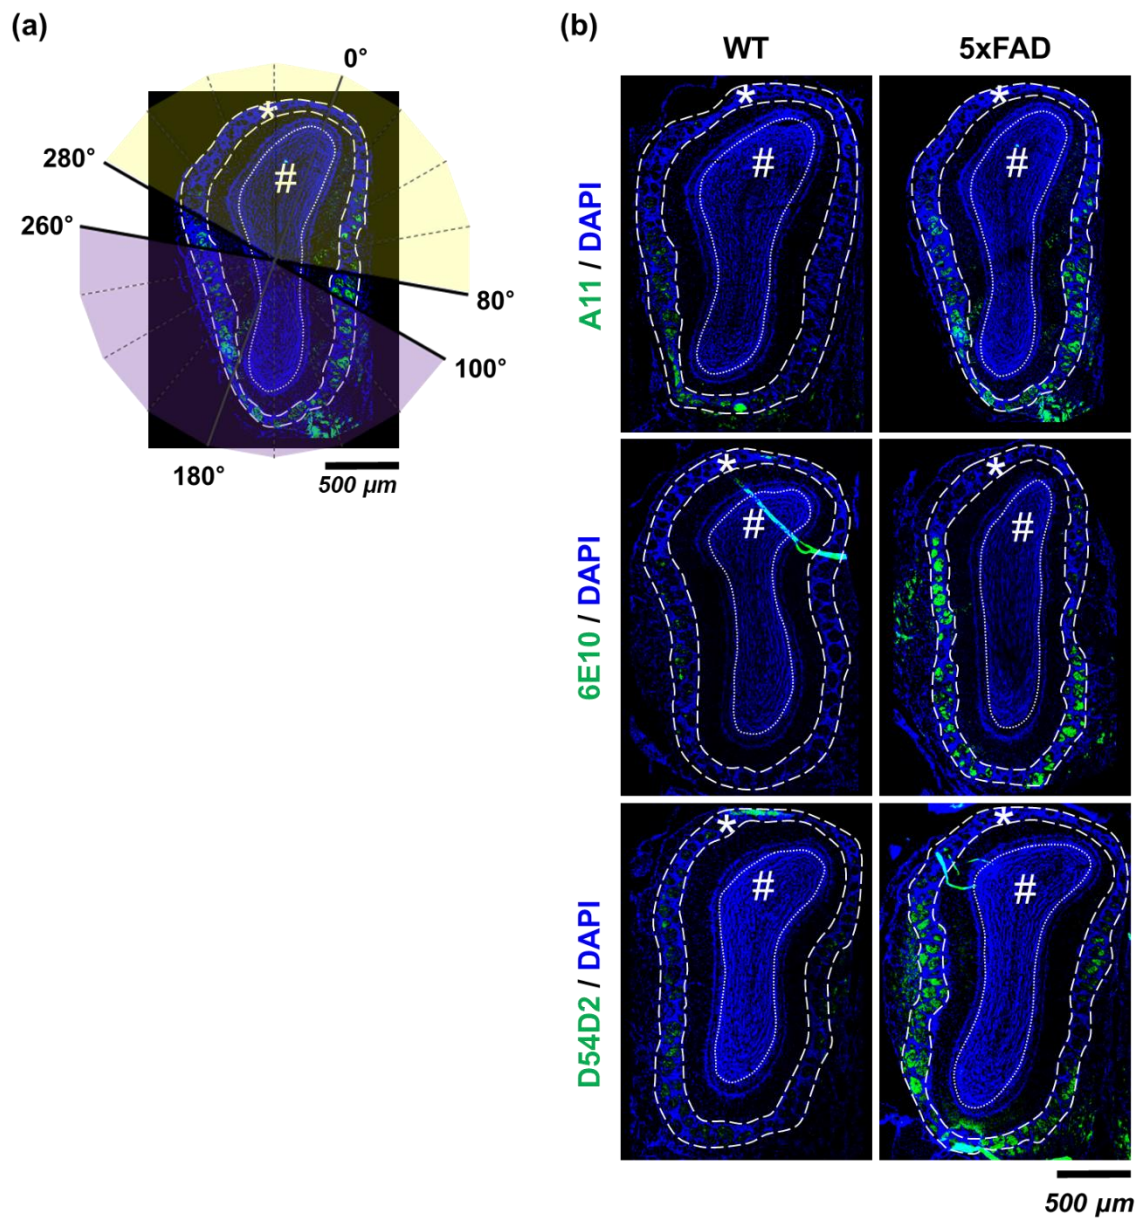

Figure S4.

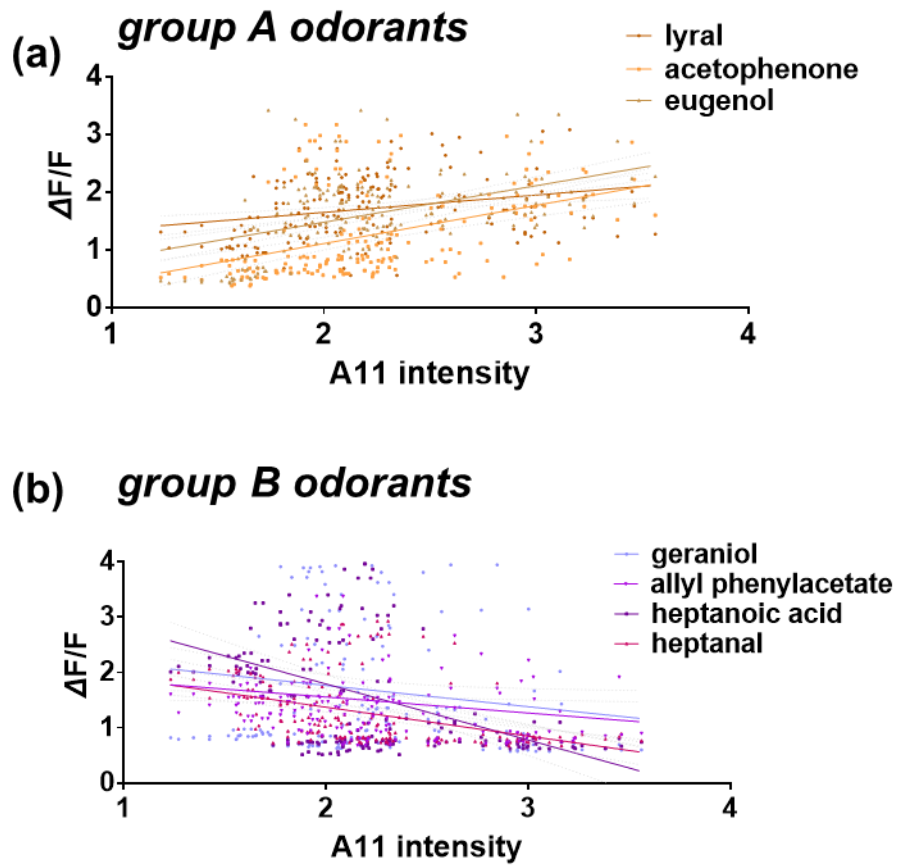

**Figure S5.**

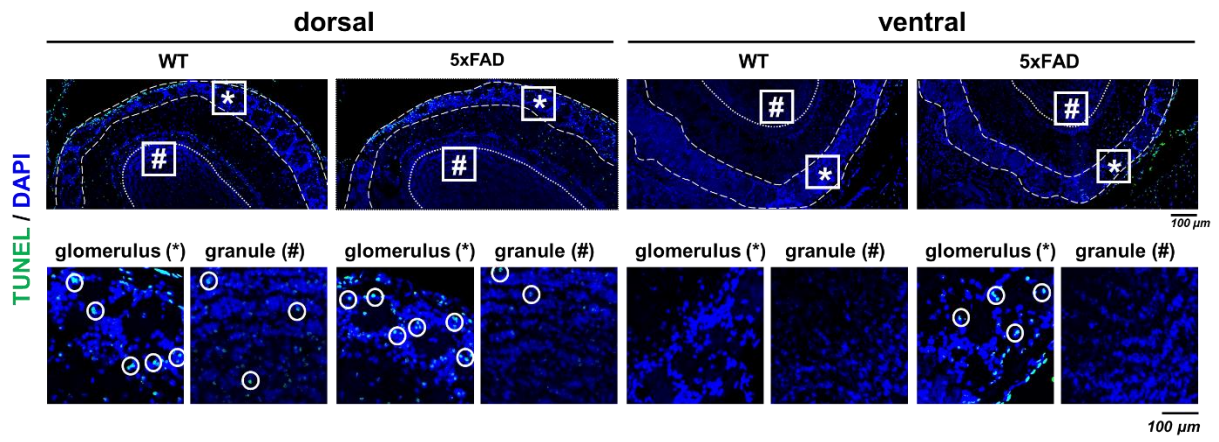

**Figure S6.**

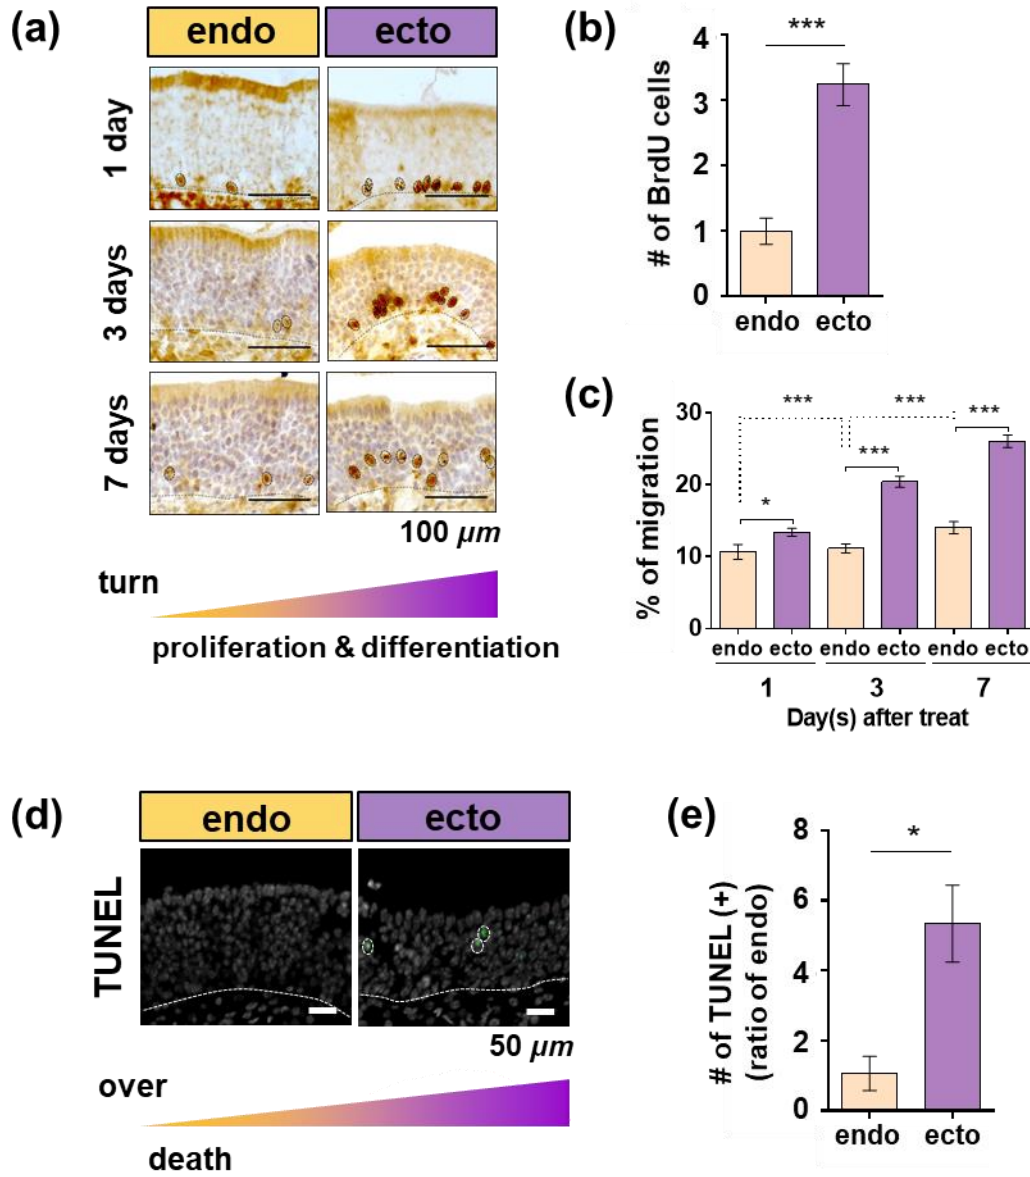

Supplement: 13195_2020_730_MOESM1_ESM.pdf [file 13195_2020_730_MOESM1_ESM.pdf]
